# Supplementary material for: Meta‐analysis of two studies in the presence of heterogeneity with applications in rare diseases
Source: PubMed Central journal article supplement — Biom J. 2016 Oct 18;59(4):658–71. doi: 10.1002/bimj.201500236 (PMC5516158; doi:10.1002/bimj.201500236), 2016-10-18
Supplement: BIMJ-59-658-s002.pdf [file BIMJ-59-658-s002.pdf]

# *Meta-analysis of two studies in the presence of heterogeneity with applications in rare diseases:*

## Supplementary material

Tim Friede\*, Christian Röver, Simon Wandel, Beat Neuenschwander

### 1 Example applications

The following figures (1–5) show data and effect estimates in analogy to Figure 1 in the main paper, but as a sensitivity check in addition using the log-normal and inverse-gamma priors. Note that half-Normal and log-Normal priors are assumed for the heterogeneity ( $\tau$ ) while the inverse-Gamma prior is assumed for the squared heterogeneity ( $\tau^2$ ); see also Section 3.7.

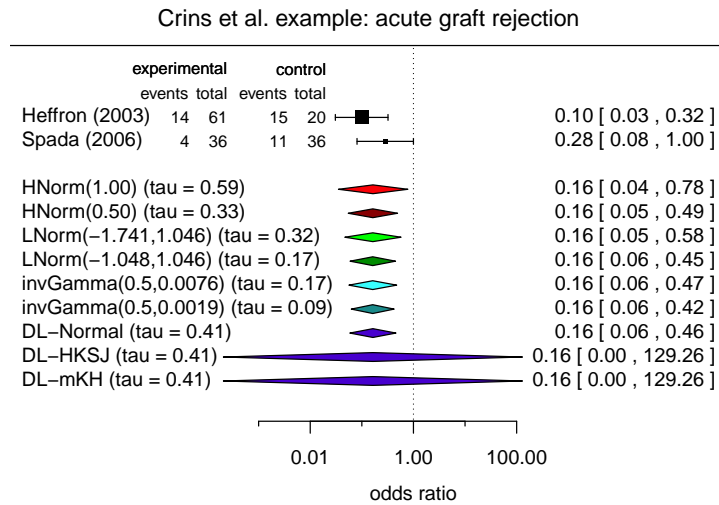

Figure 1: Crins & al. example: acute rejection, randomized studies.

---

\*email: [tim.friede@med.uni-goettingen.de](mailto:tim.friede@med.uni-goettingen.de)

Miller et al. example: mortality

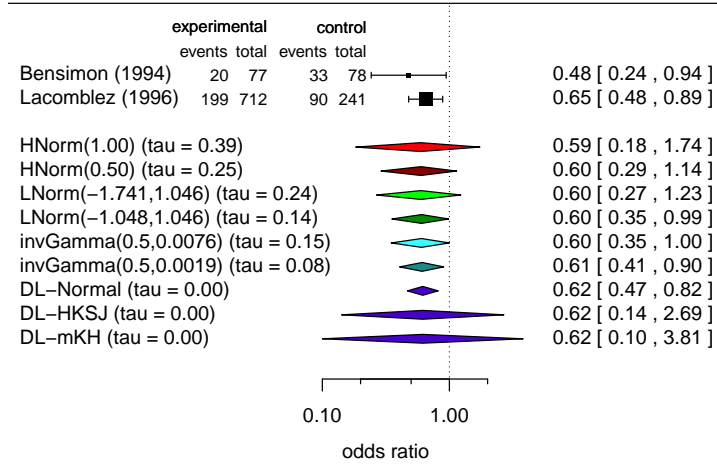

Figure 2: Miller & al. example: mortality.

Mozobil example: HSC mobilization

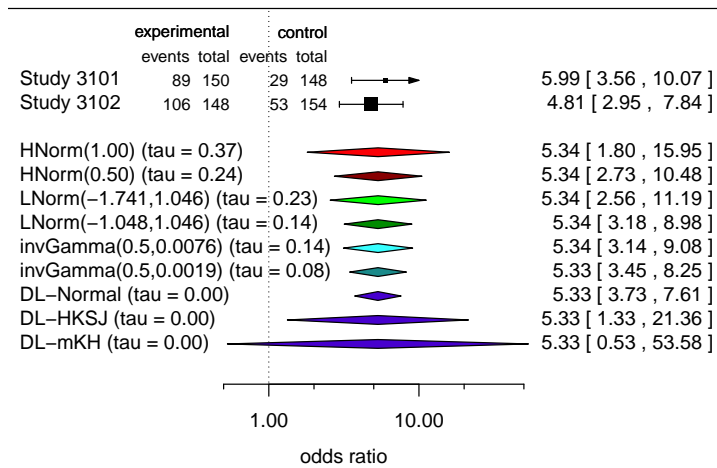

Figure 3: Mozobil example: HSC mobilization.

Romiplostim example: rescue medication incidence

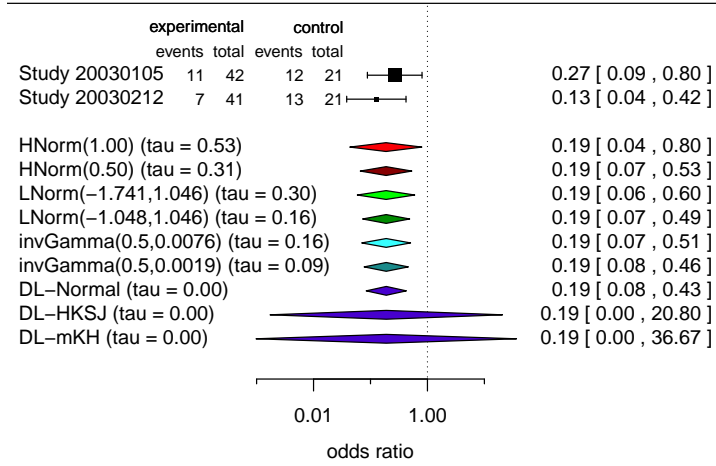

Figure 4: Romiplostim example: rescue medication.

Krystexxa example: infusion reaction

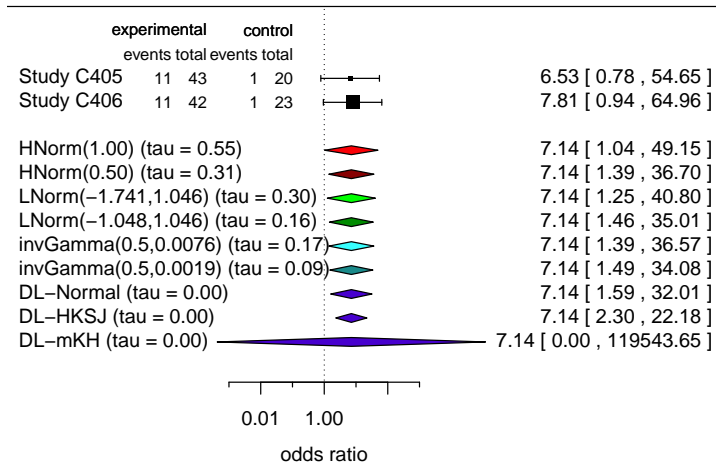

Figure 5: Krystexxa example: infusion reaction

## 2 Simulation results

The following figures (6–8) illustrate the results of the simulation study (analogous to Section 4 in the main paper), in addition showing results for the corresponding log-normal and inverse-gamma priors; see also Section 3.7 for the exact prior definitions.

CT

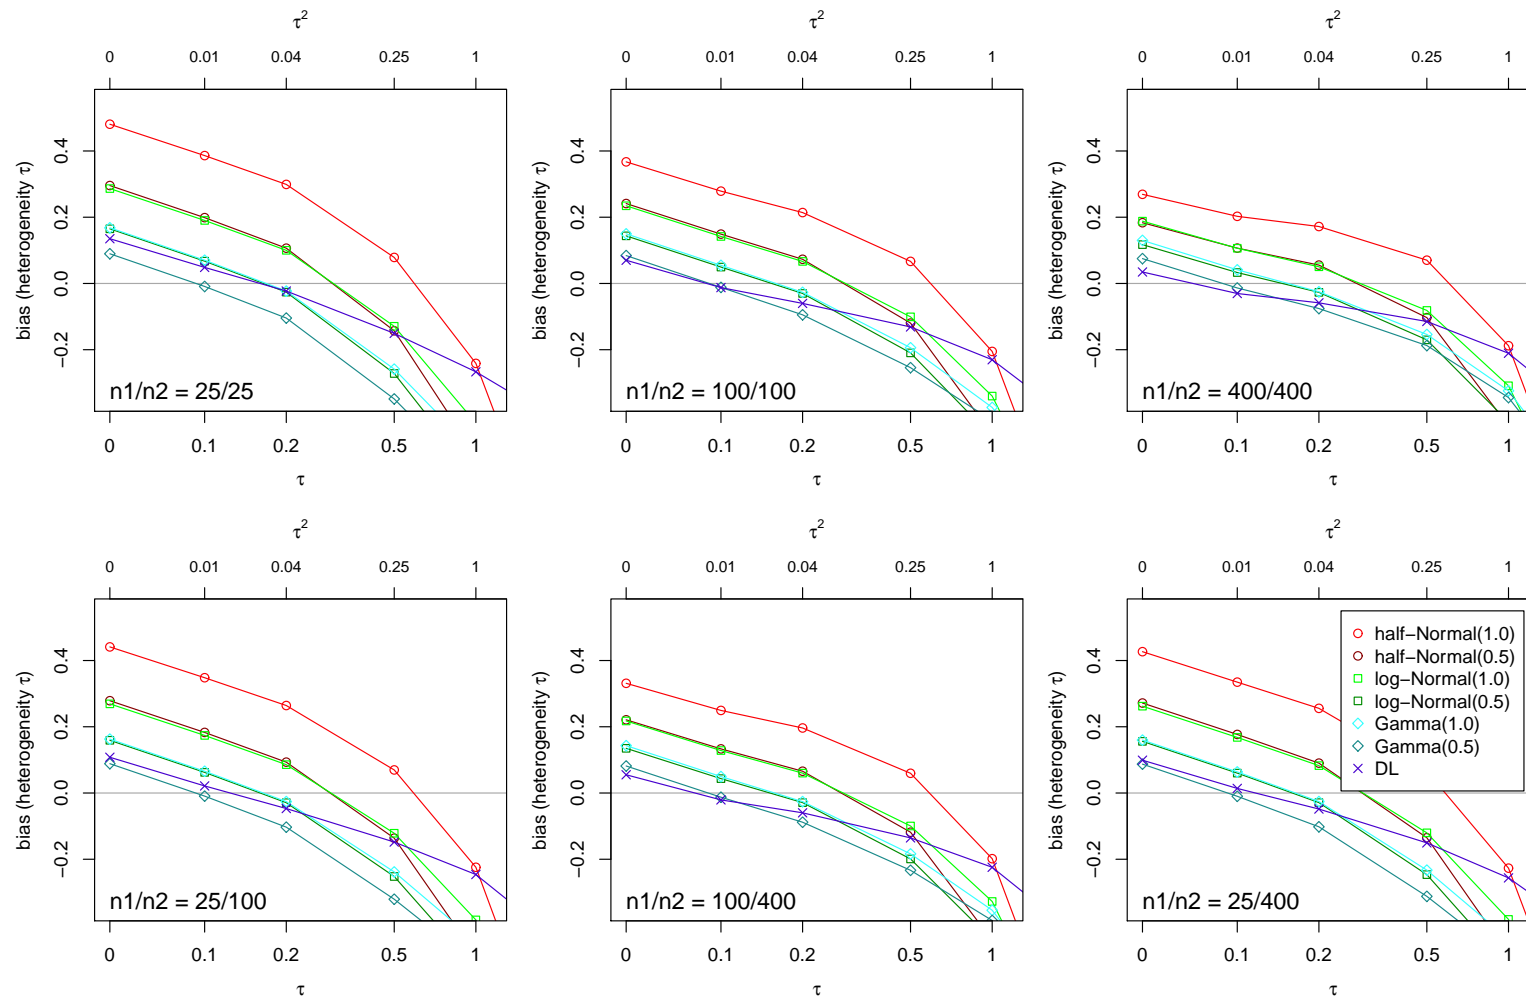

Figure 6: Heterogeneity bias.

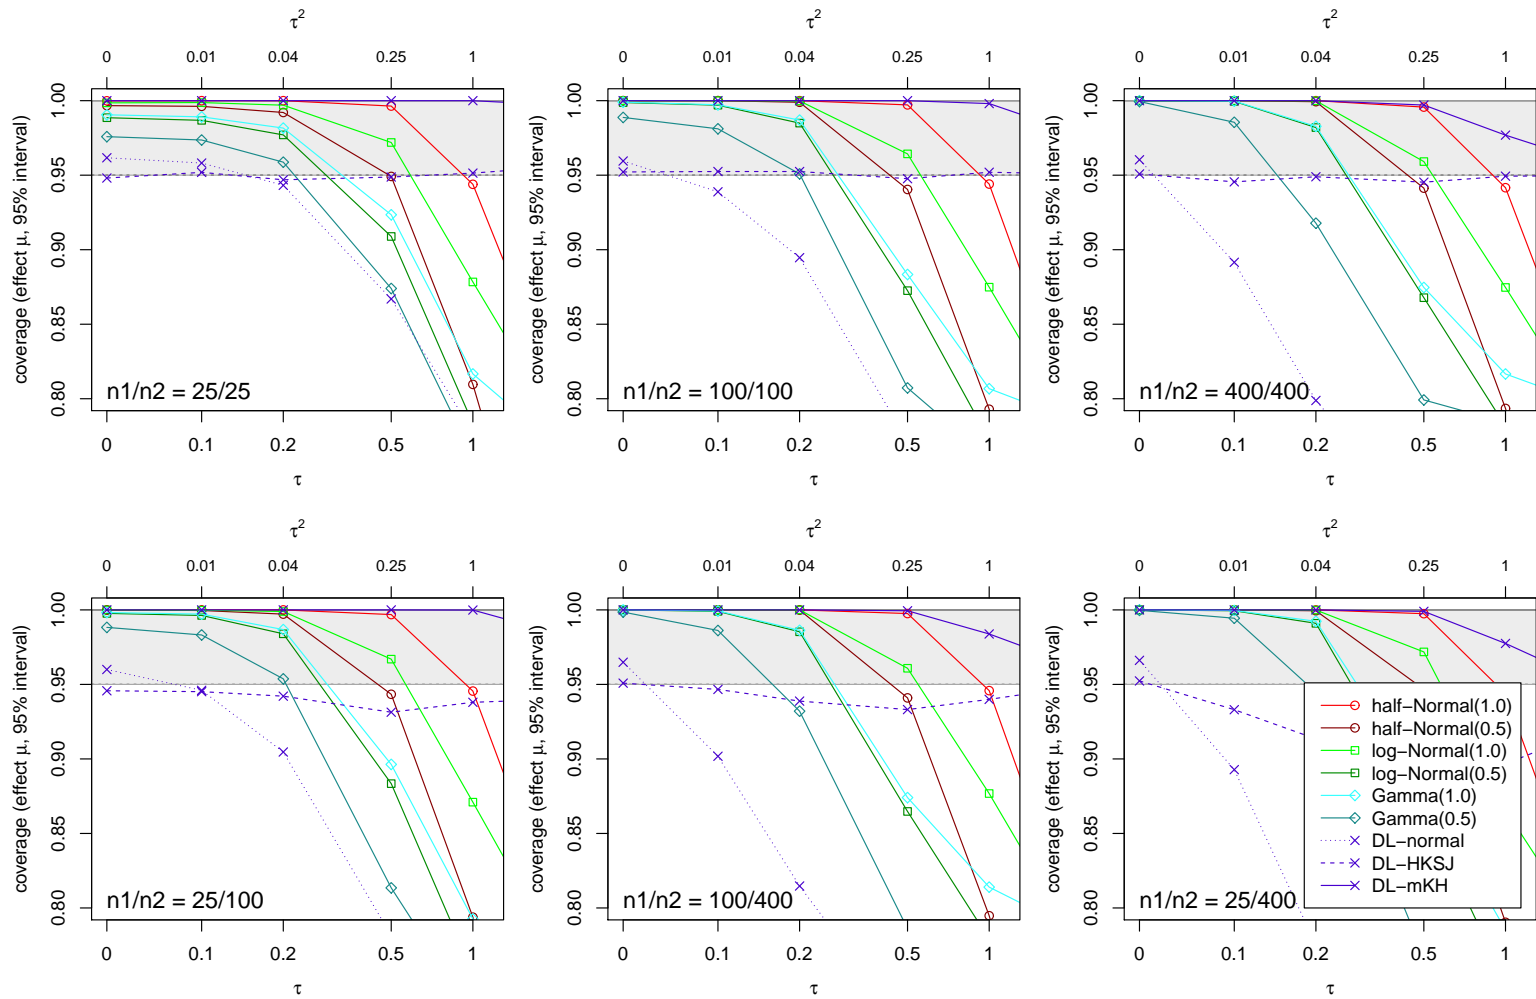

Figure 7: Effect estimate coverage (dotted: normal approx., dashed: HKSJ, solid: mKH).

L

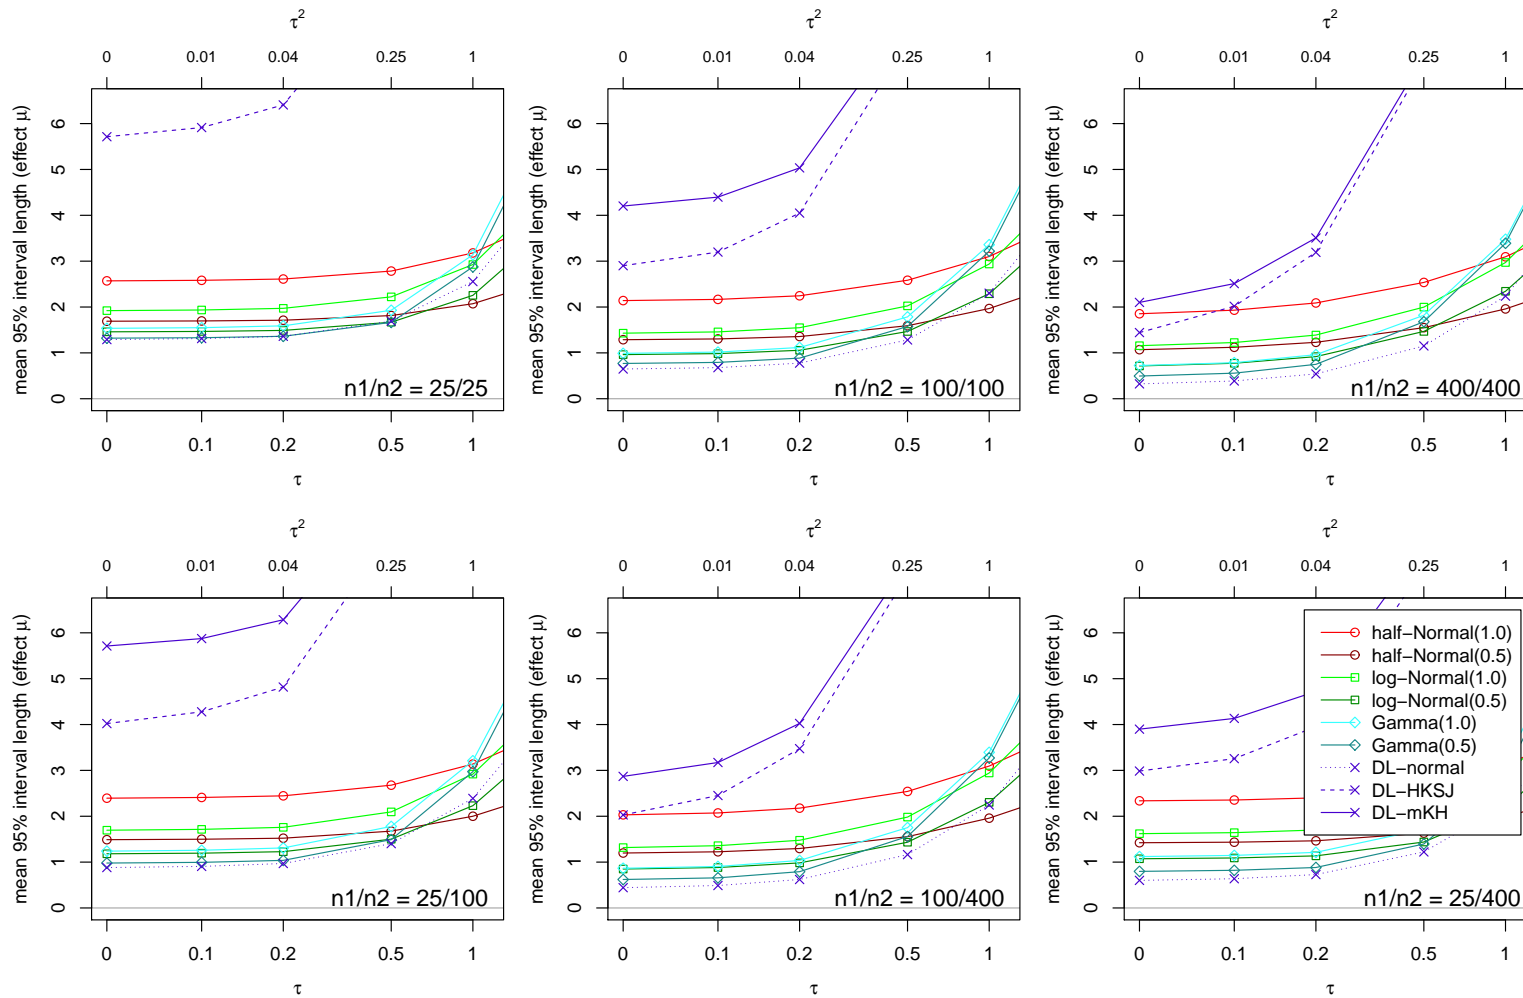

Figure 8: Mean effect CI length (dotted: normal approx., dashed: HKSJ, solid: mKH).
